# Supplementary material for: Waste Coffee Ground Biochar: A Material for Humidity Sensors
Source: MDPI journal article supplement (doi:10.3390/s19040801), 2019-02-15
Supplement: s1 [file s1]

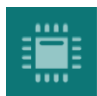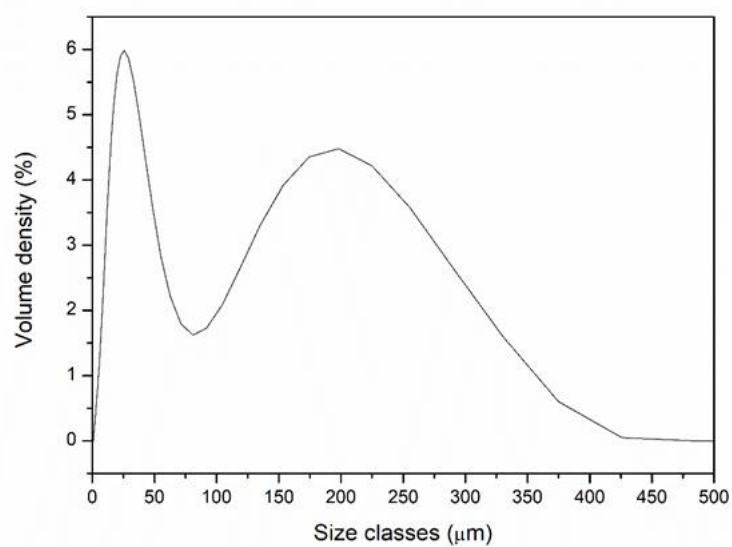

**Figure S1.** Particle size distribution of CGB powder after 5 min of sonication in ethanol.
